# Supplementary material for: Animal, fungi, and plant genome sequences harbour different non-canonical splice sites
Source: bioRxiv or medRxiv preprint supplement (doi:10.1101/616565), 2020-01-17

# animals

$r = 0.43437813971655936$ ,  $p = 7.866123362747553e-24$

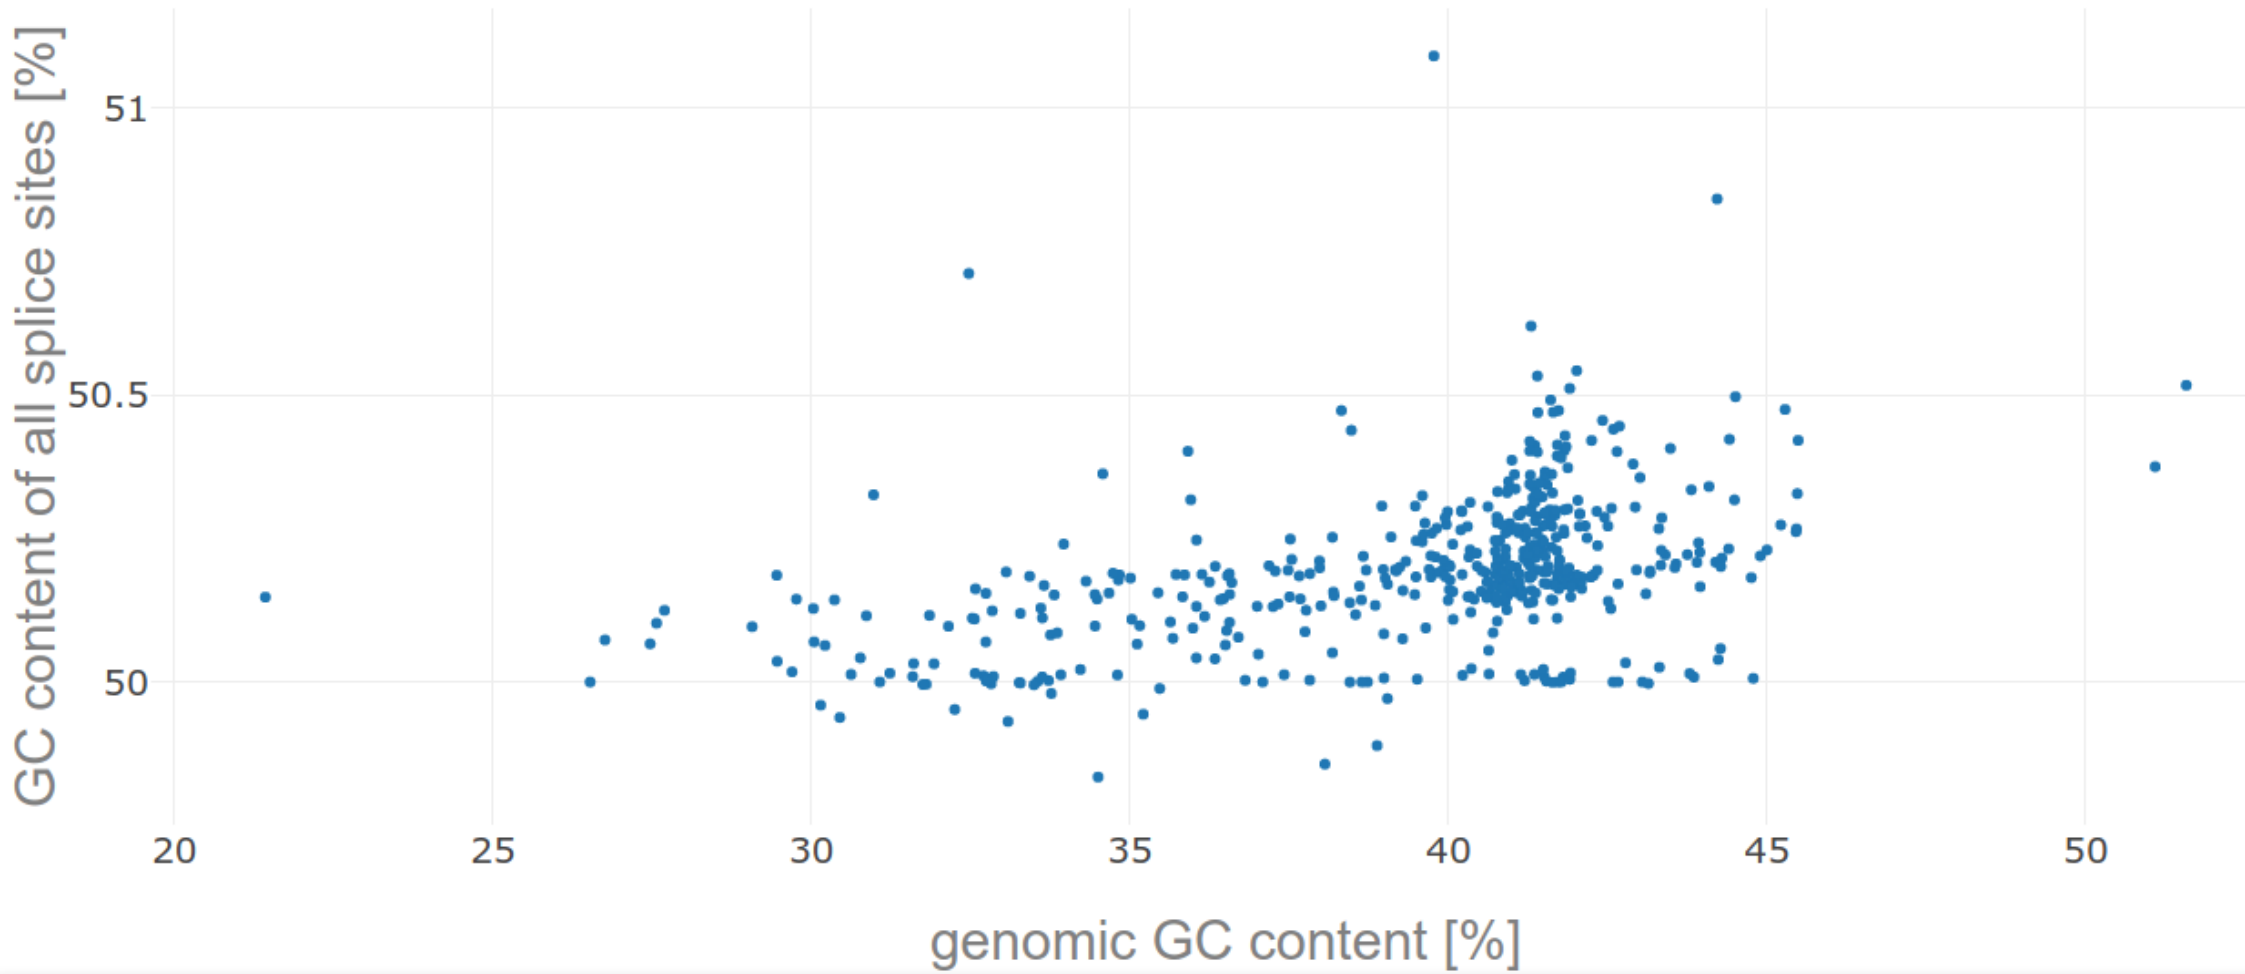

# fungi

$r = 0.23568093817494543$ ,  $p = 0.007891452637704533$

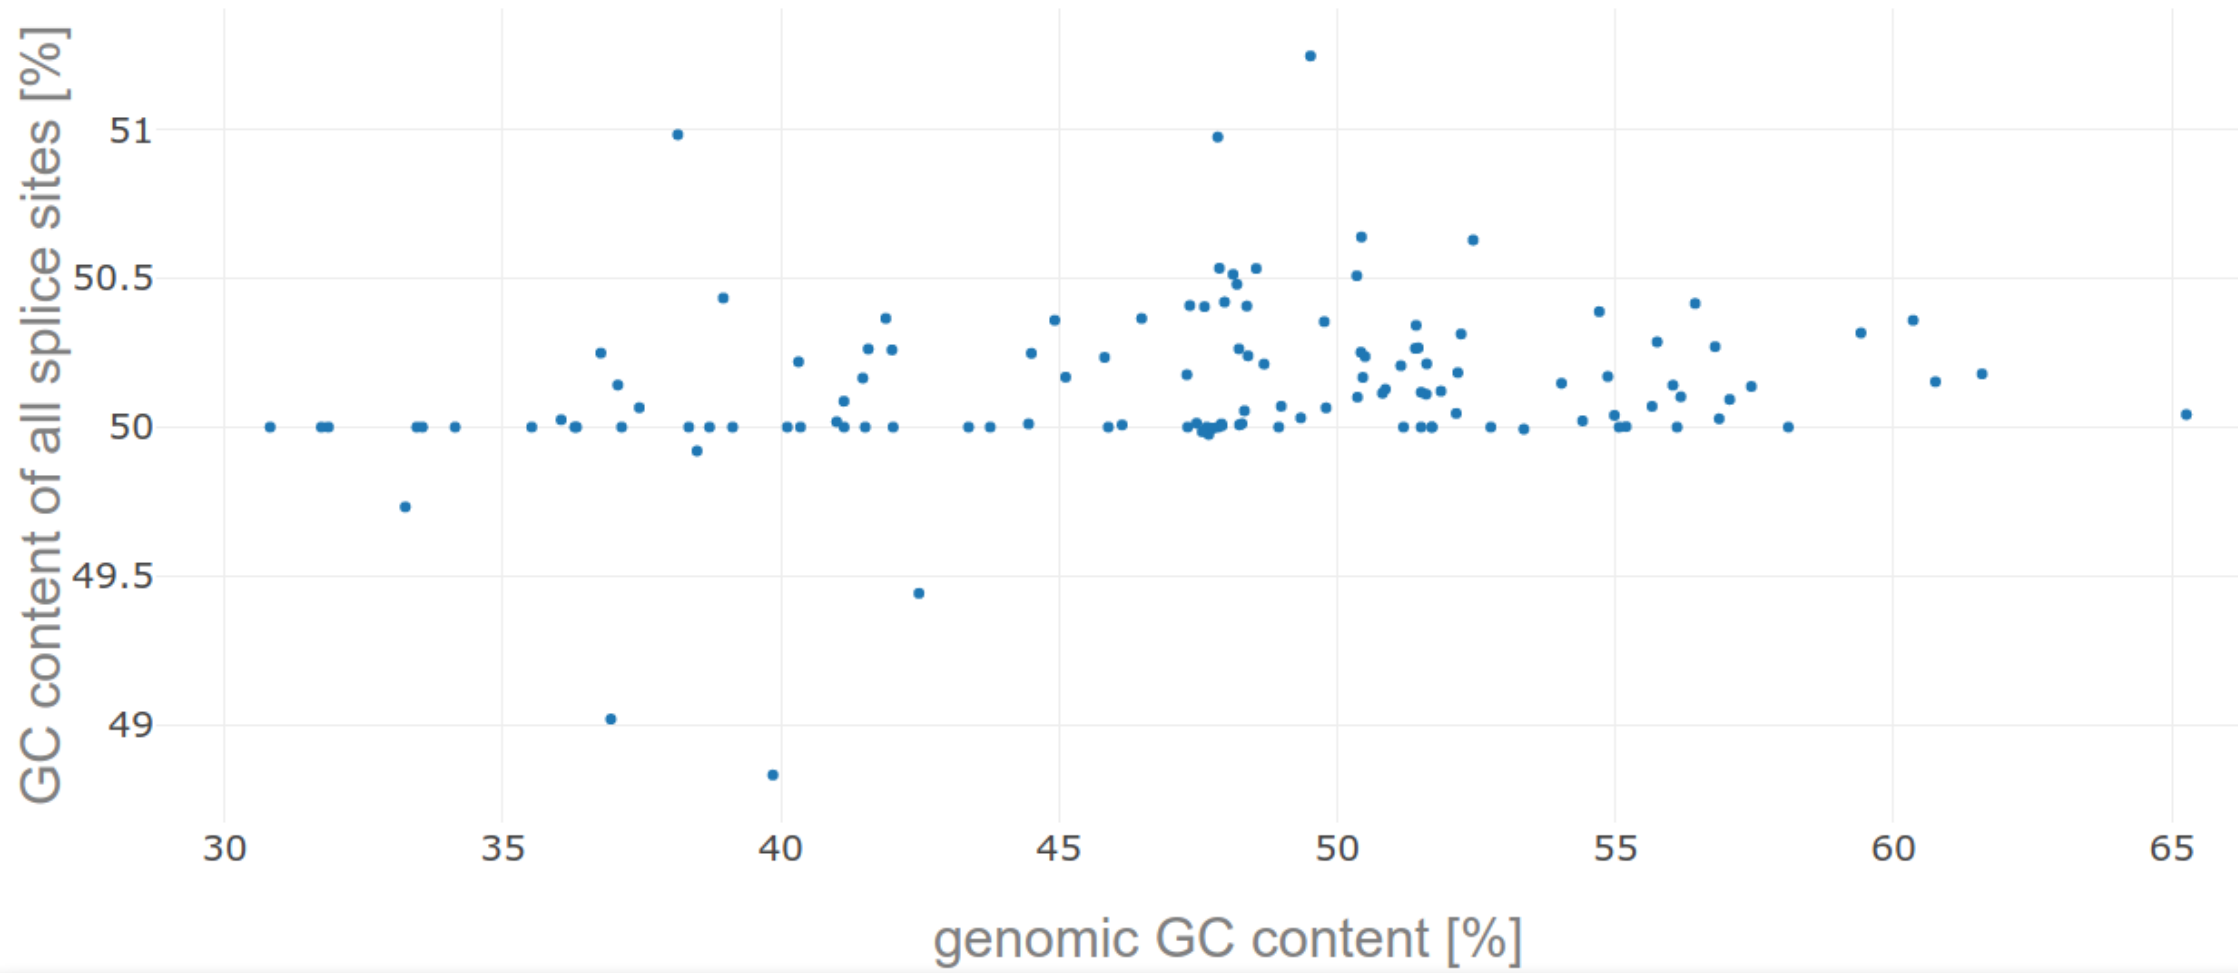

# plants

$r = 0.40330104697931257$ ,  $p = 4.504868690928474e-06$

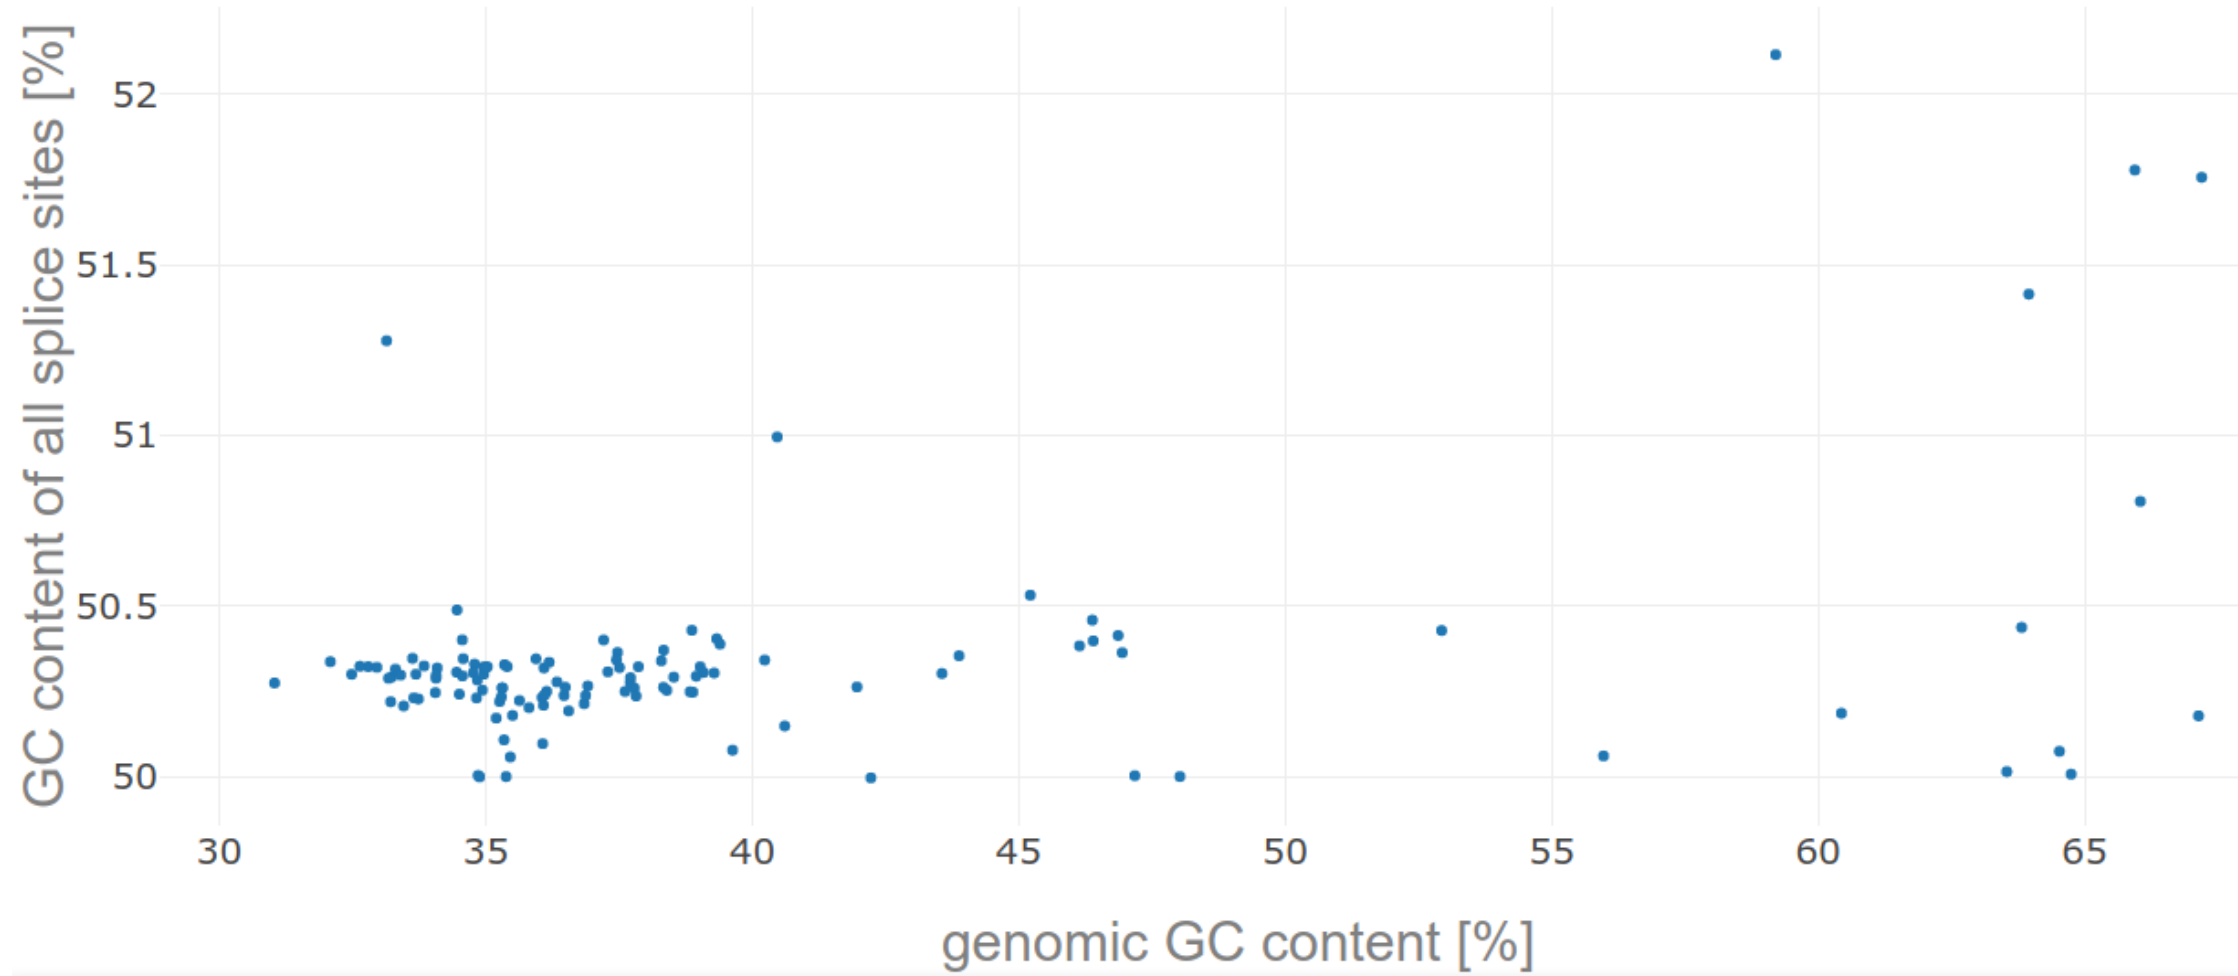

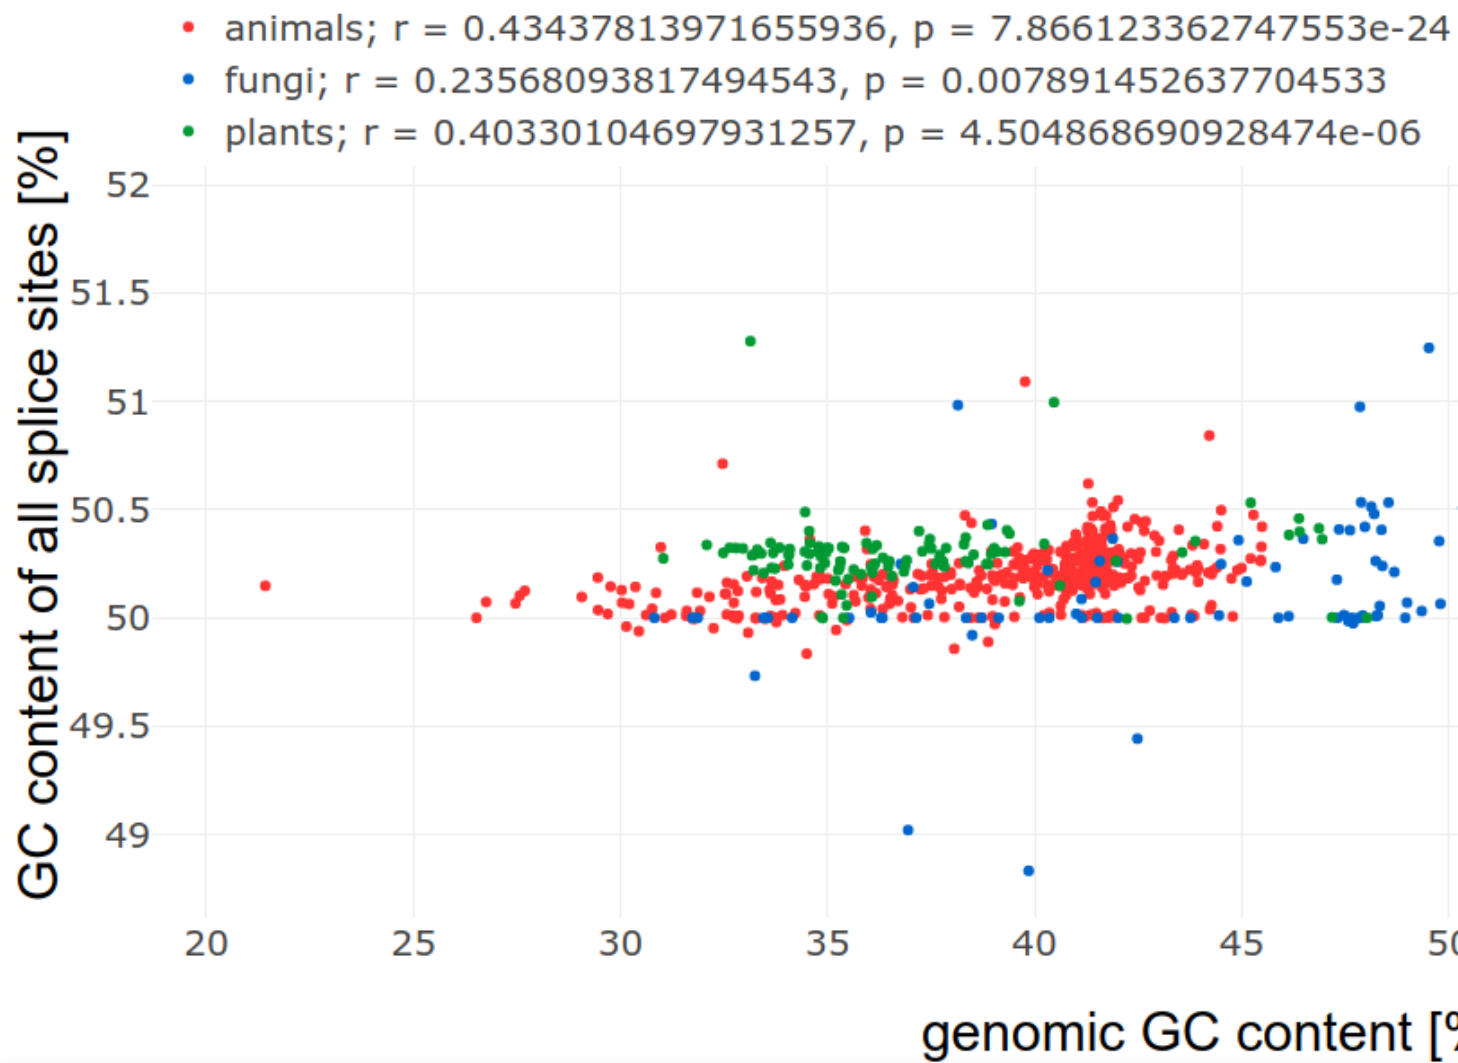

Supplement: Supplementary file [file media-10.pdf]
