# Supplementary material for: Animal, fungi, and plant genome sequences harbour different non-canonical splice sites
Source: bioRxiv or medRxiv preprint supplement (doi:10.1101/616565), 2020-01-17

# animals

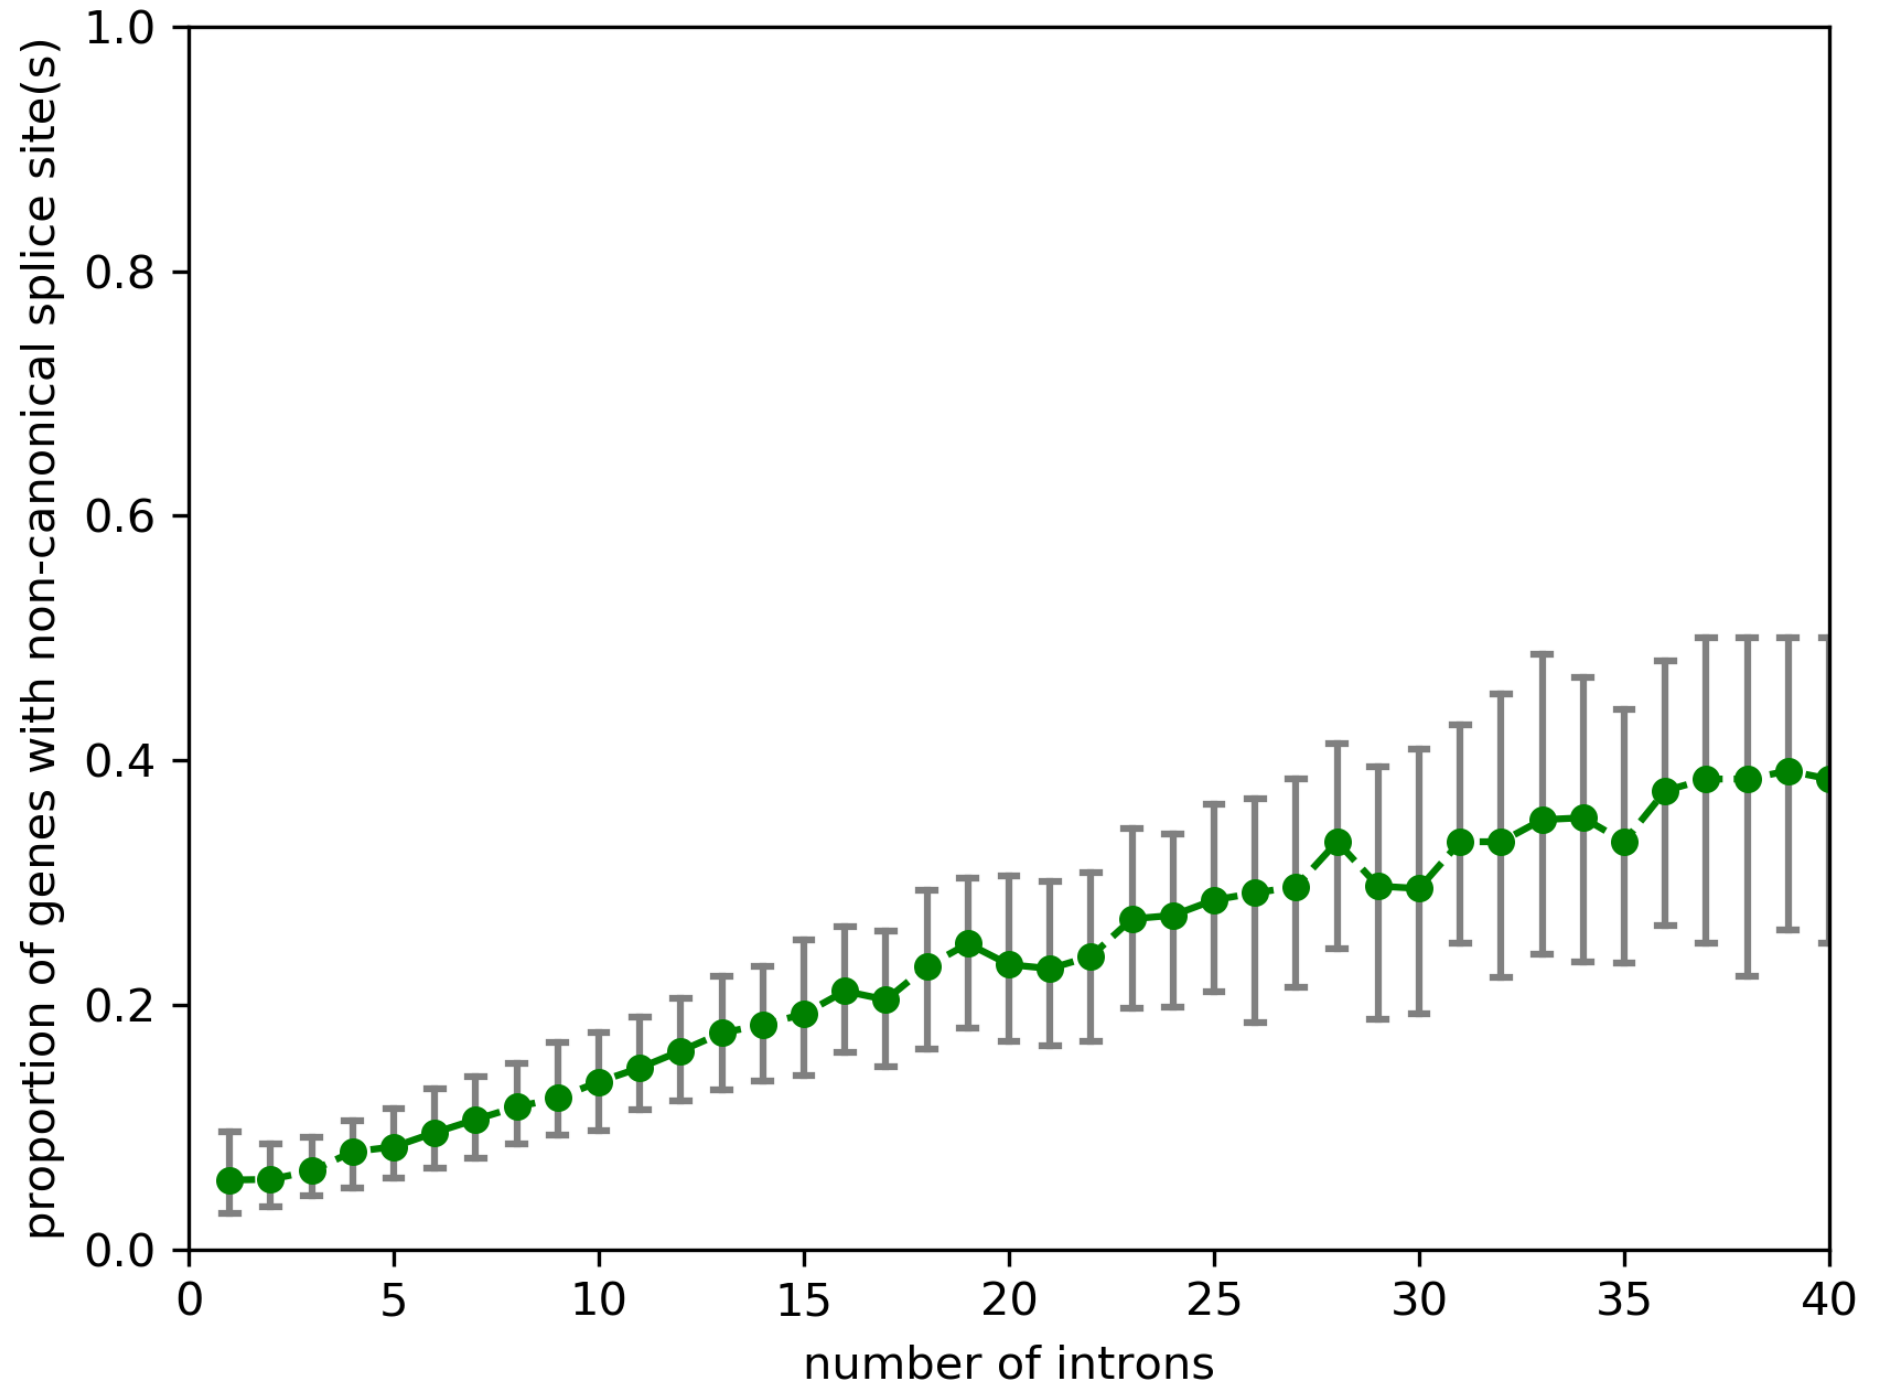

# fungi

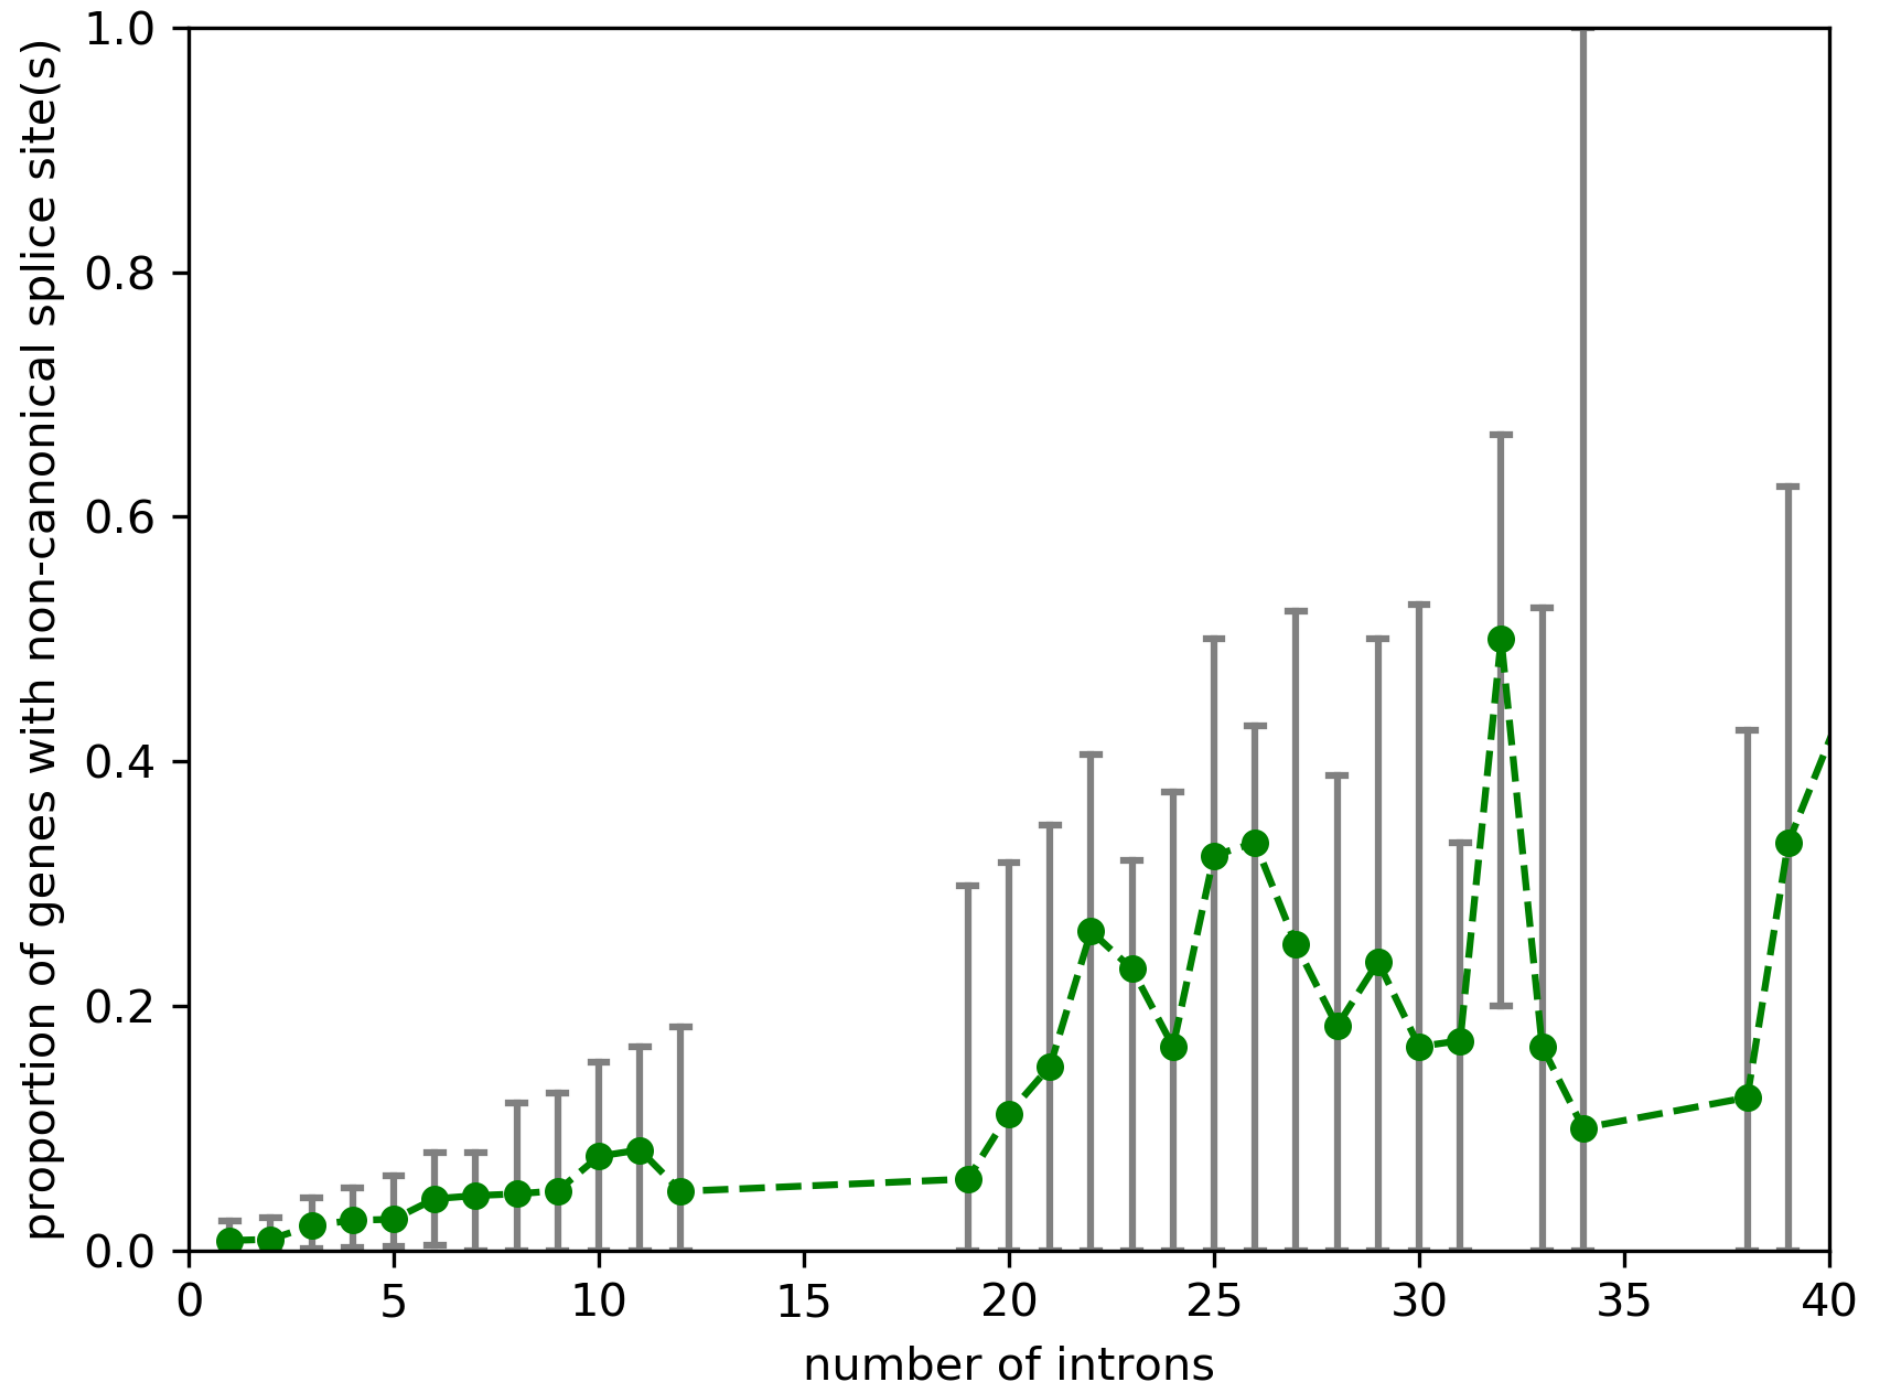

Supplement: Supplementary file [file media-12.pdf]
